# Supplementary material for: Halide and substituent dependent structural variation in copper(i) halide complexes of 1,5,9-triphosphacyclododecanes
Source: Royal Society of Chemistry journal article supplement (doi:10.1039/c8dt03072c), 2018-01-01
Supplement: c8dt03072c1.pdf [file c8dt03072c1.pdf]

## **Supplementary material.**

### **Halide and substituent dependent structural variation in copper(I) halide complexes of 1,5,9- triphosphacyclododecanes**

*Lenali V. Wickramatunga, Tusith K. Pothupitiya, Edith Chevalier, Benson M. Kariuki, Sudantha S. Liyanage, Paul D. Newman\*, and Peter G. Edwards\**

School of Chemistry, Cardiff University, Cardiff, CF10 3AT, UK.

#### **Contents**

|                            |    |
|----------------------------|----|
| Crystallographic data..... | S1 |
| References.....            | S9 |

## Crystallographic data.

### Crystal structure determination

Single-crystal XRD data for **3** and **4** were collected on an Agilent SupaNova Dual Atlas diffractometer with a mirror monochromator using either Cu ( $\lambda = 1.5418 \text{ \AA}$ ) radiation. Data for **1**, **2**, **5**, **6** and **7** were collected on a Nonius Kappa CCD diffractometer using graphite monochromated Mo-K $\alpha$  radiation ( $\lambda = 0.71073 \text{ \AA}$ ). Sample temperature was maintained at 150K using an Oxford Cryosystems cooling apparatus. Crystal structures were solved and refined using SHELXS and refined using SHELXL.<sup>i</sup> Non-hydrogen atoms were refined with anisotropic displacement parameters. Hydrogen atoms were inserted in idealized positions, and a riding model was used with Uiso set at 1.2 or 1.5 times the value of Ueq for the atom to which they are bonded. One (CH<sub>2</sub>)<sub>3</sub> group of the ligand is disordered over two orientations in structures **1**, and **3**, with occupancies 0.72(1)/0.28(1) and 0.67(1)/ 0.33(1) respectively. All three groups are disordered in structure **7** with occupancies 0.52(2)/0.48(2), 0.566(2)/0.43(2), 0.74(1)/ 0.26(1). All disordered groups were refined with restrained geometry. The isopropyl groups in **7** display elongated displacement parameters indicative of libration. All structure figures were drawn using Ortep3v2 for Windows, ellipsoids were drawn at 35% probability for all structures.<sup>ii</sup> The structures deposited with the Cambridge Structural Database (CCDC deposition numbers CCDC 1558895-1558896, 1561527 and 1845379-1845382. These data can be obtained free of charge from The Cambridge Crystallographic Data Centre via [www.ccdc.cam.ac.uk/data\\_request/cif](http://www.ccdc.cam.ac.uk/data_request/cif).

Table S1. Crystal data and structure refinement for **1**, **2**, **3**, **4**, **5**, **6** and **7**

| Compound (Identification code)                | <b>1</b>                                                                       | <b>2</b>                                                                       | <b>3</b>                                                                       |
|-----------------------------------------------|--------------------------------------------------------------------------------|--------------------------------------------------------------------------------|--------------------------------------------------------------------------------|
| CCDC reference                                | 1858170                                                                        | 1858168                                                                        | 1858173                                                                        |
| Empirical formula                             | C <sub>15</sub> H <sub>33</sub> Cl <sub>2</sub> Cu <sub>2</sub> P <sub>3</sub> | C <sub>18</sub> H <sub>39</sub> Cl <sub>2</sub> Cu <sub>2</sub> P <sub>3</sub> | C <sub>15</sub> H <sub>33</sub> Br <sub>2</sub> Cu <sub>2</sub> P <sub>3</sub> |
| Formula weight                                | 504.30                                                                         | 546.38                                                                         | 593.22                                                                         |
| Temperature /K                                | 150(2)                                                                         | 150(2)                                                                         | 150(2)                                                                         |
| Wavelength /Å                                 | 0.71073                                                                        | 0.71073                                                                        | 0.71073                                                                        |
| Crystal system                                | Orthorhombic                                                                   | Orthorhombic                                                                   | Orthorhombic                                                                   |
| Space group                                   | Pbca                                                                           | P2 <sub>1</sub> 2 <sub>1</sub> 2 <sub>1</sub>                                  | P2 <sub>1</sub> 2 <sub>1</sub> 2 <sub>1</sub>                                  |
| a/Å                                           | 8.5902(1)                                                                      | 7.8930(2)                                                                      | 8.7892(4)                                                                      |
| b/Å                                           | 15.6586(3)                                                                     | 16.1790(4)                                                                     | 12.9061(6)                                                                     |
| c/Å                                           | 32.0807(5)                                                                     | 19.5960(7)                                                                     | 19.9507(9)                                                                     |
| α/°                                           | 90                                                                             | 90                                                                             | 90                                                                             |
| β/°                                           | 90                                                                             | 90                                                                             | 90                                                                             |
| γ/°                                           | 90                                                                             | 90                                                                             | 90                                                                             |
| Volume/Å <sup>3</sup>                         | 4315.19(12)                                                                    | 2502.43(13)                                                                    | 2263.09(18)                                                                    |
| Z                                             | 8                                                                              | 4                                                                              | 4                                                                              |
| Density (calculated)/ Mgm <sup>-3</sup>       | 1.552                                                                          | 1.450                                                                          | 1.741                                                                          |
| Absorption coefficient/ mm <sup>-1</sup>      | 2.44                                                                           | 2.11                                                                           | 8.40                                                                           |
| S1Crystal size/ mm <sup>3</sup>               | 0.25x0.20x0.15                                                                 | 0.30x0.30x0.03                                                                 | 0.08 x 0.05 x 0.04                                                             |
| Reflections collected                         | 9313                                                                           | 5565                                                                           | 5794                                                                           |
| Independent reflections                       | 4951                                                                           | 5565                                                                           | 3747                                                                           |
| R(int)                                        | 0.053                                                                          | 0.081                                                                          | 0.017                                                                          |
| Data / restraints / parameters                | 4951 / 110 / 231                                                               | 5565 / 0 / 233                                                                 | 3747 / 108 / 231                                                               |
| Goodness-of-fit on F <sup>2</sup>             | 1.02                                                                           | 1.04                                                                           | 1.05                                                                           |
| R1, wR2 [I>2σ(I)]                             | 0.0489, 0.0983                                                                 | 0.0520, 0.0919                                                                 | 0.0335, 0.0891                                                                 |
| R1, wR2 (all data)                            | 0.0727, 0.1090                                                                 | 0.0791, 0.1025                                                                 | 0.0361, 0.0921                                                                 |
| Largest diff. peak and hole e.Å <sup>-3</sup> | 0.805 and -0.924                                                               | 0.562 and -0.765                                                               | 0.742 and -0.638                                                               |

| Compound (Identification code)                | <b>4</b>                                           | <b>5</b>                                           | <b>6</b>                                          |
|-----------------------------------------------|----------------------------------------------------|----------------------------------------------------|---------------------------------------------------|
| CCDC reference                                | 1858169                                            | 1858172                                            | 1858171                                           |
| Empirical formula                             | C <sub>15</sub> H <sub>33</sub> BrCuP <sub>3</sub> | C <sub>18</sub> H <sub>39</sub> BrCuP <sub>3</sub> | C <sub>15</sub> H <sub>33</sub> ICuP <sub>3</sub> |
| Formula weight                                | 449.77                                             | 491.85                                             | 496.76                                            |
| Temperature /K                                | 150(2)                                             | 150(2)                                             | 150(2)                                            |
| Wavelength /Å                                 | 0.71073                                            | 0.71073                                            | 0.71073                                           |
| Crystal system                                | Monoclinic                                         | Monoclinic                                         | Orthorhombic                                      |
| Space group                                   | P2 <sub>1</sub> /c                                 | P2 <sub>1</sub> /n                                 | Pna2 <sub>1</sub>                                 |
| a/Å                                           | 13.4480(3)                                         | 10.1600(2)                                         | 14.0792(6)                                        |
| b/Å                                           | 10.6233(3)                                         | 15.9190(4)                                         | 10.7291(4)                                        |
| c/Å                                           | 13.7607(5)                                         | 14.1560(4)                                         | 13.5869(4)                                        |
| α/°                                           | 90                                                 | 90                                                 | 90                                                |
| β/°                                           | 92.123(3)                                          | 91.038(1)                                          | 90                                                |
| γ/°                                           | 90                                                 | 90                                                 | 90                                                |
| Volume/Å <sup>3</sup>                         | 1964.53(10)                                        | 2289.17(10)                                        | 2052.40(13)                                       |
| Z                                             | 4                                                  | 4                                                  | 4                                                 |
| Density (calculated)/ Mgm <sup>-3</sup>       | 1.521                                              | 1.427                                              | 1.608                                             |
| Absorption coefficient/ mm <sup>-1</sup>      | 6.17                                               | 2.91                                               | 2.79                                              |
| S1Crystal size/ mm <sup>3</sup>               | 0.29x0.10x0.06                                     | 0.28x0.28x0.24                                     | 0.30 x 0.10 x 0.03                                |
| Reflections collected                         | 6042                                               | 8551                                               | 4466                                              |
| Independent reflections                       | 6042                                               | 5225                                               | 4466                                              |
| R(int)                                        |                                                    | 0.029                                              | 0.058                                             |
| Data / restraints / parameters                | 6042 / 0 / 184                                     | 5225 / 0 / 214                                     | 4466 / 32 / 185                                   |
| Goodness-of-fit on F <sup>2</sup>             | 1.15                                               | 1.03                                               | 1.111                                             |
| R1, wR2 [I>2σ(I)]                             | 0.0584, 0.1689                                     | 0.0359, 0.0668                                     | 0.0507, 0.0932                                    |
| R1, wR2 (all data)                            | 0.0622, 0.1713                                     | 0.0521, 0.0723                                     | 0.0921, 0.1106                                    |
| Largest diff. peak and hole e.Å <sup>-3</sup> | 1.150 and -0.574                                   | 0.413 and -0.424                                   | 0.995 and -0.735                                  |

|                                               |                                                   |
|-----------------------------------------------|---------------------------------------------------|
| Compound (Identification code)                | 7                                                 |
| CCDC reference                                | 1858174                                           |
| Empirical formula                             | C <sub>18</sub> H <sub>39</sub> CuIP <sub>3</sub> |
| Formula weight                                | 538.84                                            |
| Temperature /K                                | 150(2)                                            |
| Wavelength /Å                                 | 0.71073                                           |
| Crystal system                                | Monoclinic                                        |
| Space group                                   | P2 <sub>1</sub> /c                                |
| a/Å                                           | 9.0360(3)                                         |
| b/Å                                           | 16.1750(6)                                        |
| c/Å                                           | 16.9400(6)                                        |
| α/°                                           | 90                                                |
| β/°                                           | 105.035(2)                                        |
| γ/°                                           | 90                                                |
| Volume/Å <sup>3</sup>                         | 2391.15(15)                                       |
| Z                                             | 4                                                 |
| Density (calculated)/ Mgm <sup>-3</sup>       | 1.497                                             |
| Absorption coefficient/ mm <sup>-1</sup>      | 2.40                                              |
| S1Crystal size/ mm <sup>3</sup>               | 0.24x0.22x0.20                                    |
| Reflections collected                         | 9491                                              |
| Independent reflections                       | 5467                                              |
| R(int)                                        | 0.054                                             |
| Data / restraints / parameters                | 5467 / 336 / 298                                  |
| Goodness-of-fit on F <sup>2</sup>             | 1.03                                              |
| R1, wR2 [I>2σ(I)]                             | 0.0637, 0.1203                                    |
| R1, wR2 (all data)                            | 0.1241, 0.1407                                    |
| Largest diff. peak and hole e.Å <sup>-3</sup> | 1.400 and -0.778                                  |

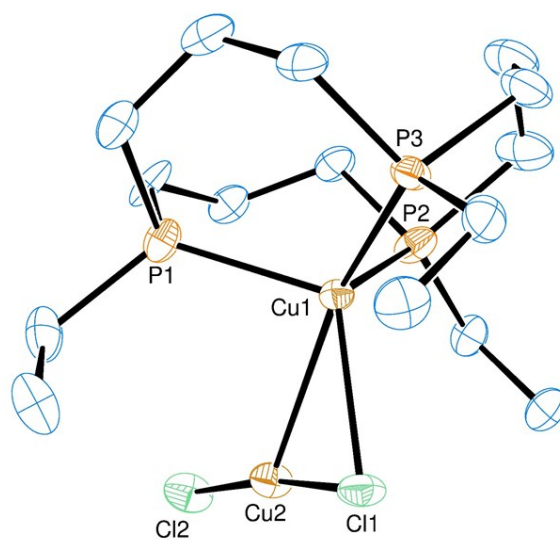

Fig 1: A 35% probability Ortep representation of the asymmetric unit of **1** with hydrogen atoms and disordered atoms omitted.

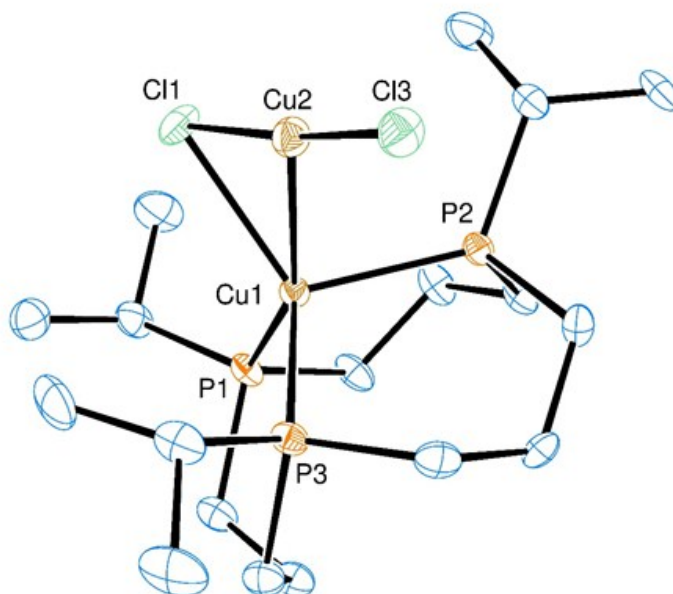

Figure 2: A 35% probability Ortep representation of the asymmetric unit of **2** with hydrogen atoms omitted for clarity.

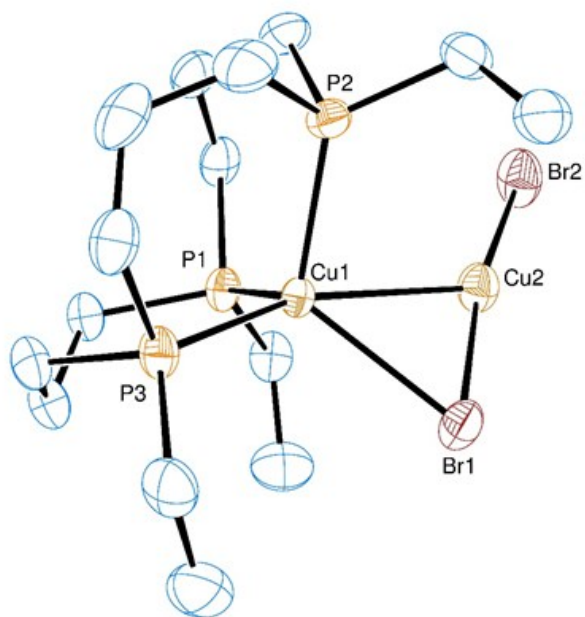

Figure 3: A 35% probability Ortep representation of the asymmetric unit of **3** with hydrogen atoms omitted for clarity.

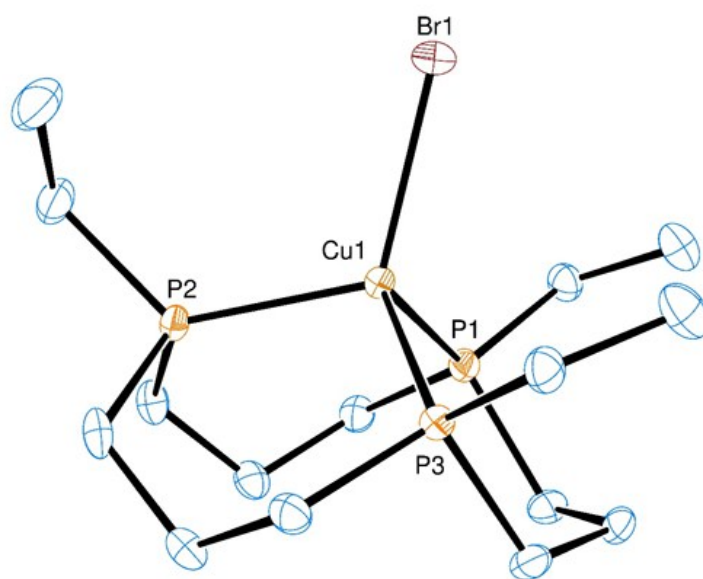

Figure 4: A 35% probability Ortep representation of the asymmetric unit of **4** with hydrogen atoms omitted for clarity.

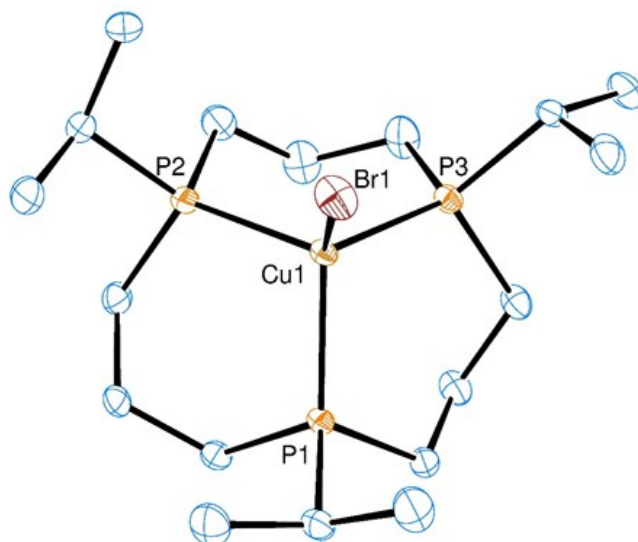

Figure 5: A 35% probability Ortep representation of the asymmetric unit of **5** with hydrogen atoms omitted for clarity.

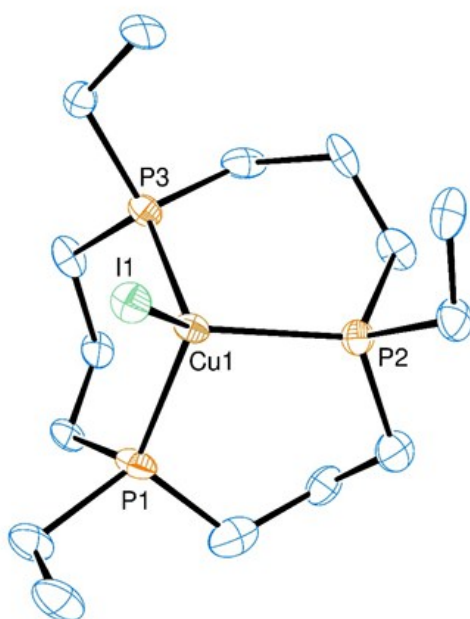

Figure 6: A 35% probability Ortep representation of the asymmetric unit of **6** with hydrogen atoms omitted for clarity.



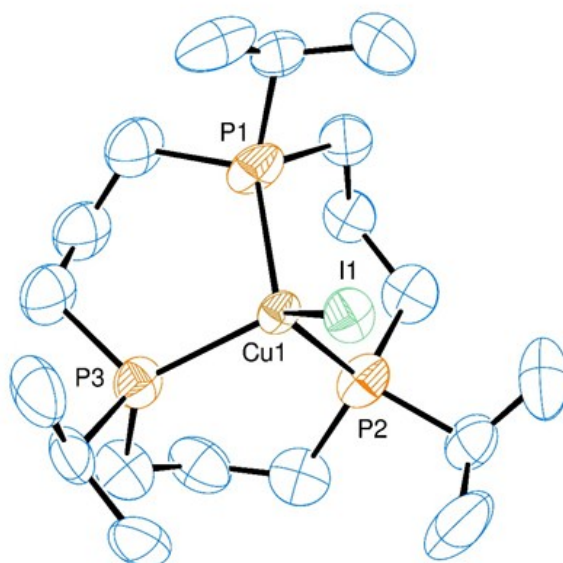

Figure 7: A 35% probability Ortep representation of the molecular structure of **7** with hydrogen atoms and disordered atoms omitted for clarity.

---

i) G. M. Sheldrick, *Acta Cryst.* 2015, **C71**, 3.

ii) L.J. Farrugia, *J. Appl. Cryst.*, 1997, **30**, 565.
